# Supplementary material for: Global patterns and drivers of influenza decline during the COVID-19 pandemic
Source: bioRxiv or medRxiv preprint supplement (doi:10.1101/2022.07.15.22277497), 2022-07-17
Supplement: Supplementary file [file media-1.pdf]

1 **Supplementary material**

2 **Global patterns and drivers of influenza decline during the**  
3 **COVID-19 pandemic**

4 Francesco Bonacina<sup>1,2</sup>, Pierre-Yves Boëlle<sup>1</sup>, Vittoria Colizza<sup>1,3</sup>, Olivier Lopez<sup>2</sup>, Maud  
5 Thomas<sup>2</sup>, Chiara Poletto<sup>1</sup>

6 <sup>1</sup>INSERM, Sorbonne Université, Pierre Louis Institute of Epidemiology and Public Health, Paris, France

7 <sup>2</sup>Sorbonne Université, CNRS, Laboratoire de Probabilités, Statistique et Modélisation, LPSM, Paris, France

8 <sup>3</sup>Tokyo Tech World Research Hub Initiative (WRHI), Tokyo Institute of Technology, Tokyo, Japan

9 Corresponding author: Chiara Poletto (chiara.poletto@inserm.fr)

|    |                                                                            |           |
|----|----------------------------------------------------------------------------|-----------|
| 10 | <b>Additional methods</b>                                                  | <b>2</b>  |
| 11 | Definition of trimesters                                                   | 2         |
| 12 | Details on the computation of the log relative influenza level             | 2         |
| 13 | Definition of covariates                                                   | 2         |
| 14 | Algorithms for the regression analysis                                     | 7         |
| 15 | <b>Additional results</b>                                                  | <b>8</b>  |
| 16 | Countries included in the analysis                                         | 8         |
| 17 | Regression tree                                                            | 8         |
| 18 | <b>Robustness checks and sensitivity analyses</b>                          | <b>14</b> |
| 19 | Robustness of the variable selection procedure                             | 14        |
| 20 | Robustness of the tree structure optimization                              | 14        |
| 21 | Robustness of the tree under small perturbations of the dataset            | 14        |
| 22 | Sensitivity of the variable selection under changes on the assumption made | 14        |
| 23 | <b>Bibliography</b>                                                        | <b>16</b> |

## 24 **Additional methods**

### 25 **Definition of trimesters**

26 The trimesters considered in the analyses are periods of 13 weeks, defined so that the  
27 winter trimester best covers the typical period of flu epidemics in northern countries.  
28 Northern countries are defined as countries with latitude above the Tropic of Cancer. The  
29 winter trimester is identified based on FluNet data from 1995 to 2019, as follows. For each of  
30 the 365 possible starting dates of the trimester (a window of 91 days), we computed the  
31 annual proportion of positive cases falling in the period, averaged over all northern countries  
32 and years. We then define the winter trimester as the one that contains the highest annual  
33 proportion of positive cases. The spring, summer and autumn trimesters are identified  
34 accordingly. Also, we verified that the summer trimester according to this definition roughly  
35 contains the highest proportion of positive cases for southern countries. The winter, spring,  
36 summer and autumn trimesters obtained begin the first Monday following 12 December, 12  
37 March, 11 June and 11 September, respectively. Certain years have 53 weeks instead of 52,  
38 thus trimesters may occasionally have 14 weeks.

### 39 **Details on the computation of the log relative influenza level**

40 Data reported on FluNet were partial or not consistent in some cases. Number of processed  
41 tests was sometimes different from the sum of positive and negative tests. In this case, the  
42 sum of positive and negative tests was used as the number of processed tests. When one of  
43 the three records (processed, positive and negative tests) was missing, this could be  
44 computed from the other two. The number of processed tests, when missing, was computed  
45 from the sum of positive and negative tests, the number of positive tests, when missing, was  
46 computed from the difference between processed and negative tests (provided the former  
47 was larger or equal to the later), and so on. We discarded weeks in which only processed  
48 and either positive or negative tests were present and the number of processed tests was  
49 smaller than the number of positive/negative tests. We also discarded weeks with only one  
50 record. Russia showed some irregularities with certain weeks having the number of  
51 processed tests nearly equal to the number of positive tests differently from the preceding or  
52 following weeks, signalling sudden changes in the data collection and sharing protocol.  
53 These weeks were removed from the analysis.

54 Before calculating the percentage of positive influenza tests, 0.5 positive cases are added to  
55 each country-trimester, so that the positivity rate always results greater than zero. This  
56 allows distinguishing countries without influenza and with a massive surveillance system  
57 from countries without influenza but processing only a few tests.

58 When working with percentages - e.g. the percentage of influenza positive samples or the  
59 percentage of annual influenza samples falling in a certain trimester - the centre of the  
60 distribution was computed from the closure of the geometric mean, that was proved to be a  
61 BLU (best linear unbiased) estimator, unlike the standard arithmetic mean [1].

### 62 **Definition of covariates**

63 Definition of the covariates included in the main analyses:

- 64 • **age**: median age of population, UN projection for 2020.

- 65 • **longitude**: longitude of the centre of population of the country in degrees, from -180  
66 (W) to 180 (E). Longitude of the country is computed as the average longitude of all  
67 the cities of the country with more than 300K inhabitants. The average is weighted for  
68 the population size of each city. If there are no cities in the country with at least 300K  
69 inhabitants, the longitude of the capital is considered.
- 70 • **latitude**: latitude of the centre of population of the country in degrees, from -90 (S) to  
71 90 (N). The latitude is calculated analogously to *longitude*.
- 72 • **T**: average temperature (in Celsius degrees) of the country-trimester. For each  
73 country, the temperature is computed as the average temperature of all the cities  
74 within the country with more than 300K inhabitants, weighted by the population size.  
75 If there are no cities in the country with at least 300K inhabitants, the capital is  
76 considered. Temperature data are taken from the ERA5 dataset, which provides  
77 hourly estimates of weather variables for all locations identified by a regular lat-lon  
78 grid of 0.25 degrees. The temperature of a city is calculated by looking at the closest  
79 grid point to the city and averaging the temperatures for the hours 0h00, 6h00, 12h00  
80 and 18h00 of each day of the trimester.
- 81 • **RH**: average relative humidity, computed analogously to the *temperature*.
- 82 • **IDVI**: Score for the preparedness of a country in facing infectious diseases, from 0  
83 (most vulnerable) to 1 (less vulnerable).
- 84 • **COVID-19 daily cases**: number of reported daily cases of COVID-19 per million of  
85 inhabitants averaged over the trimester.
- 86 • **workplace presence reduction**: median over the trimester of the daily percentage  
87 reduction of presence at workplaces.
- 88 • **reduction of international flights**: average percentage of reduction in the inbound  
89 and outbound air passengers of the country for each trimester with respect to the  
90 same trimester of 2019. The reduction for a trimester is calculated as the weighted  
91 average of the monthly reduction for the 4 months covering the trimester, with first  
92 and last months of the trimester, partially covered by the trimester, weighted 0.5,  
93 while the other months, fully covered by the trimester, weighted 1. The reduction for  
94 the month  $m$  and year  $y=2020,2021$  is defined as  $1 - w_{m,y}/w_{m,2019}$ , with  $w$  being the  
95 number of passengers flying to or from the country.
- 96 • **nb days of school closure**: number of days over the trimester when policies related  
97 to schools and universities closure were implemented. The OxGRT dataset provides  
98 2 daily variables: (i) the level of severity of the policy as measured on an ordinal  
99 scale (0=no measure, 1=altered openings for schools, 2=closing certain  
100 levels/categories of schools, 3=complete closure), and (ii) the geographical scope,  
101 i.e. whether that policy is enforced locally or nationally. Based on the values of these  
102 variables different definitions of school closure are possible - severity equal or above  
103 1, 2, or 3, and each of these severity levels being implemented either locally or  
104 nationally. To choose the most convenient definition we used an unsupervised  
105 approach. We first computed the number of days with school closure for each data  
106 point (country-trimester) for all possible definitions. We then computed the  
107 distribution of the number of days with school closure over all data points and picked  
108 the definition with maximum resolution power, i.e. that maximises the number of  
109 observations with values not falling in the extremes. We obtained that schools are  
110 considered to be closed if certain levels/categories of schools were closed on a  
111 national scale or if there was at least one complete closure on a local scale.
- 112 • **nb days of workplace closure**: The severity levels defined in the OxGRT dataset  
113 were: 0=no measures, 1=recommend closings, 2=require closing for some  
114 sectors/categories of workers, 3=require closing for all-but-essential workplaces.  
115 With the unsupervised procedure described for school closure we obtained that

- 116 workplaces were defined as closed for stringency level at least 2 nationwide, or for  
 117 stringency level 3 locally.
- 118 • **nb days of public event restrictions:** The severity levels defined in the OxGRT  
 119 dataset were: 0=no measures, 1=recommend cancelling, 2=require cancelling. With  
 120 the unsupervised procedure we obtained that public events were defined as closed  
 121 when there was a countrywide enforcement.
  - 122 • **nb days of gathering restrictions:** The severity levels defined in the OxGRT  
 123 dataset were: 0=no restrictions, 1=restrictions above 1000 people, 2=restrictions  
 124 between 101-1000 people, 3=restrictions between 11-100 people, 4=restrictions on  
 125 gatherings of 10 people or less. With the unsupervised procedure we defined as  
 126 gatherings restriction a nationwide ban of gatherings of more than 100 people.
  - 127 • **nb days of public transport restrictions:** The severity levels defined in the OxGRT  
 128 dataset were: 0=no measures, 1=recommend closing, 2=require closing. With the  
 129 unsupervised procedure we obtained that public transports were defined as closed  
 130 when a recommendation (level 1) was issued at local or national level.
  - 131 • **nb days of stay at home requirements:** The severity levels defined in the OxGRT  
 132 dataset were: 0=no measures, 1=recommend not leaving house, 2= require not  
 133 leaving house with exceptions for 'essential' trips, 3=require not leaving house with  
 134 minimal exceptions. With the unsupervised procedure described for school closure  
 135 we obtained that staying at home was implemented for severity level 1 or more,  
 136 locally or nationally.
  - 137 • **nb days of international travel restrictions:** The severity levels defined in the  
 138 OxGRT dataset were: 0=no restrictions, 1=screening arrivals, 2=quarantine arrivals  
 139 from some or all regions, 3=ban arrivals from some regions, 4=ban on all regions or  
 140 total border closure. With the unsupervised procedure we obtained that international  
 141 travels were defined as enacted for severity level 3 or 4.
  - 142 • **nb days of facial covering requirements:** The severity levels defined in the  
 143 OxGRT dataset were: 0=no policy, 1=recommended, 2=required in some specified  
 144 shared/public spaces with other people present, 3=required in all shared/public  
 145 spaces with other people present, 4=required at all times regardless of location or  
 146 presence of other people. With the unsupervised procedure we obtained that mask  
 147 use was implemented for severity level 3 or 4.
  - 148 • **nb days of testing implementation:** The severity levels defined in the OxGRT  
 149 dataset were: 0=no testing policy, 1=only those who both (a) have symptoms AND  
 150 (b) meet specific criteria, 2=testing of anyone showing COVID-19 symptoms, 3=open  
 151 public testing. With the unsupervised procedure we obtained that testing policies  
 152 were defined as implemented for stringency level 3.
  - 153 • **nb days of contact tracing implementation:** The severity levels defined in the  
 154 OxGRT dataset were: 0=no contact tracing, 1=not for all cases, 2=contact tracing for  
 155 all identified cases. With the unsupervised procedure we obtained that contact  
 156 tracing was defined as implemented for severity level 2.
  - 157 • **nb days of elderly shielding:** The severity levels defined in the OxGRT dataset  
 158 were: 0=no measures, 1=recommended isolation, hygiene, and visitor restriction  
 159 measures in LTCFs and/or elderly people to stay at home, 2=narrow restrictions for  
 160 isolation, hygiene in LTCFs, some limitations on external visitors and/or restrictions  
 161 protecting elderly people at home, 3=extensive restrictions for isolation and hygiene  
 162 in LTCFs, all non-essential external visitors prohibited, and/or all elderly people  
 163 required to stay at home and not leave the home with minimal exceptions, and  
 164 receive no external visitors. With the unsupervised procedure described for school  
 165 closure we obtained that protection of elderly people was defined as implemented  
 166 when it was enforced at least at level 2 locally or nationally.

167 Definition of the covariates included in the sensitivity analyses:

- 168 • **COVID-19 daily deaths:** number of reported daily deaths of COVID-19 per million of  
 169 inhabitants averaged over the trimester.

- 170
- 171
- 172
- 173
- 174
- 175
- 176
- 177
- 178
- 179
- 180
- 181
- 182
- **station presence reduction:** median over the trimester of the daily percentage reduction of presence in public transport stations and transportation hubs.
  - **recreation place presence reduction:** median over the trimester of the daily percentage reduction of presence at restaurants, bars, shopping malls and other recreation places.
  - **home presence rise:** median over the trimester of the daily percentage rise of presence in residential places.
  - **stringency index:** average of the daily stringency index provided by OxCGRT. This index combines eight indicators of containment and closure policies and an indicator regarding the presence of public information campaigns related to the pandemic. The daily index ranges from 0 for countries with no measures, to 100 for countries adopting maximally stringent policies regarding all nine indicators. Seven of the eleven indicators considered in the previous covariates are included in this index.

183 Covariate distributions: We provide in Figure S1 the distributions of the log relative influenza  
184 level and the covariates across countries-trimesters.

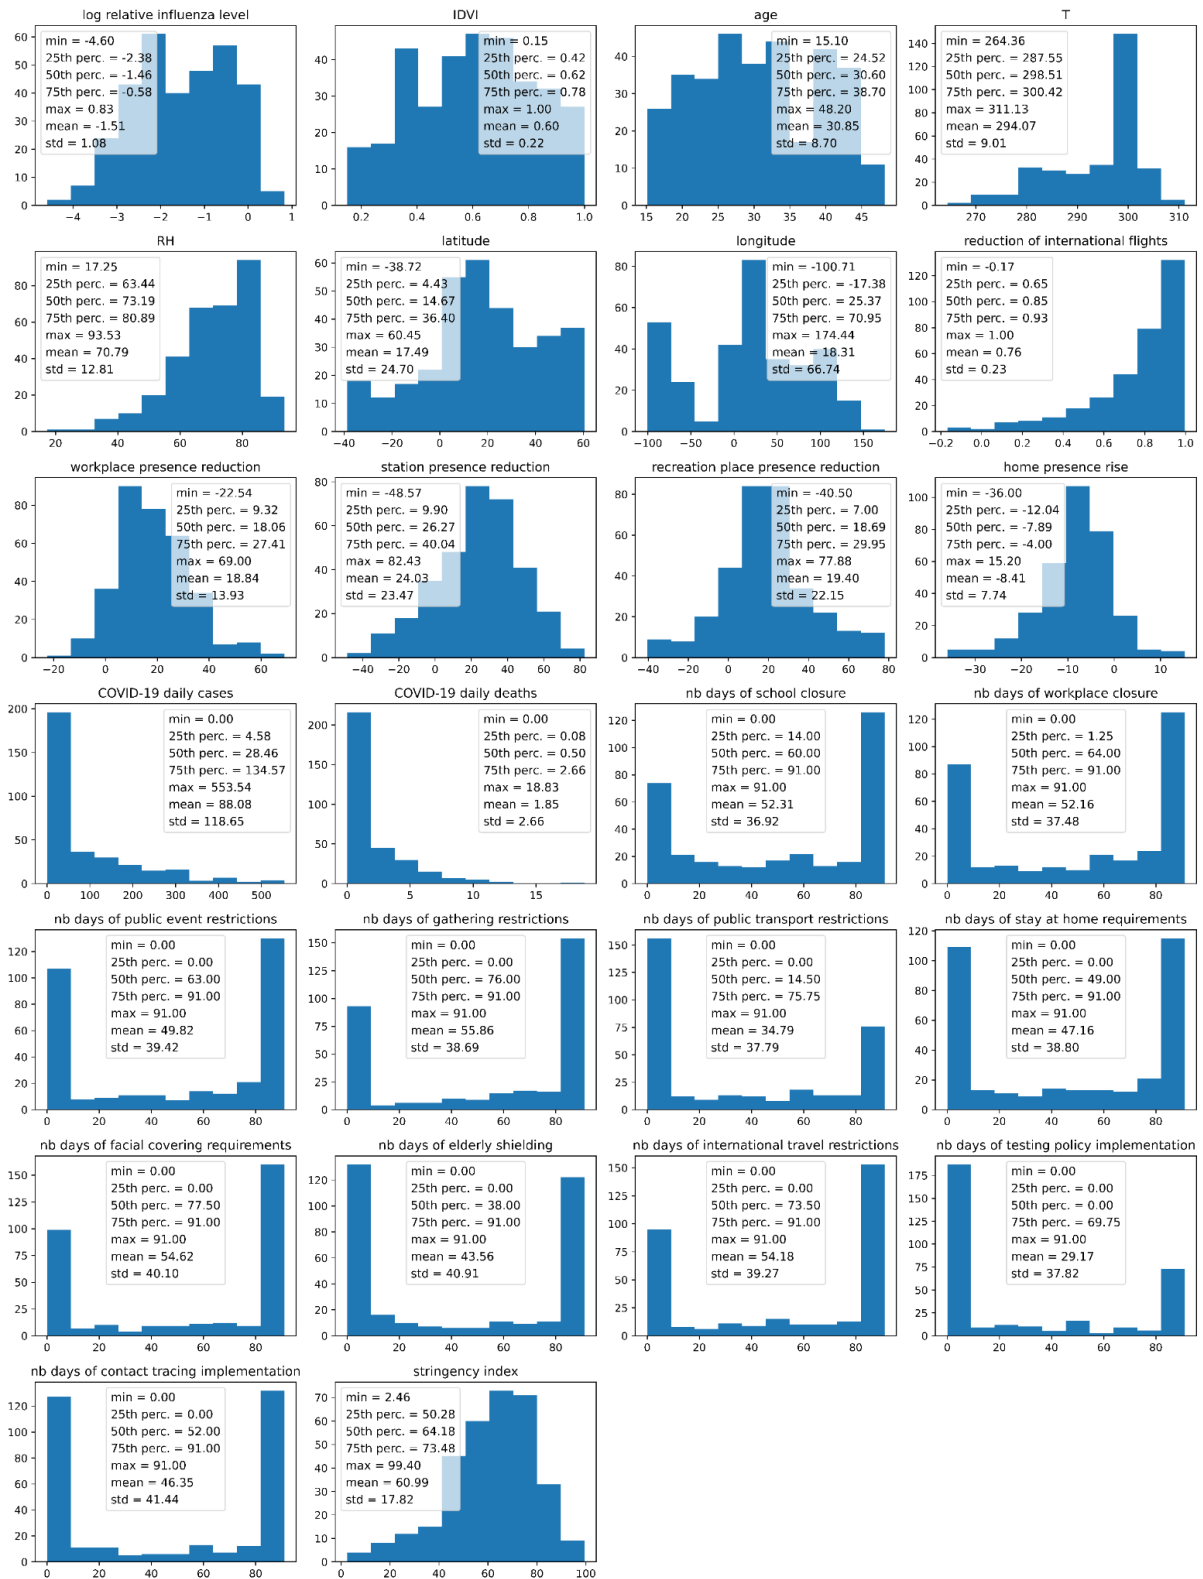

185 **Figure S1. Distributions of the 26 variables considered in the regression analysis, for all the 330**  
 186 **observations included in the study.** For each plot, summary values of the distributions are shown in the  
 187 legend. We included here both the covariates considered in the main analysis and the covariates considered in  
 188 the sensitivity analysis.

## 189 Algorithms for the regression analysis

190 Clustering and regression trees: We relied on the CART algorithm [2] to classify countries-  
191 trimesters based on a target variable, here the log relative influenza level. In a nutshell,  
192 observations are iteratively split in groups according to a covariate selected at each iteration  
193 so that the intra-group variance of the target variable is minimised. We controlled the  
194 structure of the tree by fixing the minimum number of observations in a terminal leaf  
195 (*minbucket*) and the regularisation parameter *cp* in the R package *rpart* [3]. The two  
196 parameters are optimised by cross-validation.

197 Cross-Validation for the hyperparameter tuning of the regression tree: The search for the  
198 optimal values of *minbucket* and *cp* is run over the following grid of parameters:  
199  $minbucket \in \{4 \leq m \leq 18 \vee m \in N\}$  and  $cp \in \{0.001 * c \vee 0 \leq c \leq 20, c \in N\}$ . For each point of the  
200 parameter space, 2000 trees were generated. Each tree is created on a random sample of  
201 70% of the data and its prediction error (1-coefficient of determination) is calculated on the  
202 remaining 30% of the observations. Following Breiman' rule, the optimal tree is identified as  
203 the smallest tree that has mean prediction error less than the minimum error increased by its  
204 standard deviation. The simplest tree is identified by looking at the smallest number of splits  
205 on average, the largest *minbucket*, and the largest *cp*, in order. The optimal parameters  
206 identified were *cp*=0.011, *minbucket*=4.

207 Variable selection through permutation risk measures for covariate importance: The Variable  
208 Selection Using Random Forests (VSURF) algorithm has been exploited to identify the  
209 predictors associated with the reduction of influenza. This method evaluates the importance  
210 of each variable by measuring the prediction error increase when values of one variable at a  
211 time are permuted. This is a classical method used in the framework of Random Forests  
212 and, more in general, in machine learning algorithms. Also, some studies pointed out that  
213 permutation risk measures of variable importance are often more effective than alternative  
214 methods based on Sobol's indices or Shapley values [4].

215 The VSURF algorithm was run using the following parameters: *ntrees*=8000, *nfor.thres*=100,  
216 *nfor.interpr*=100, *nfor.pred*=100 (and *mtry*=6 by default).

## 217 Additional results

### 218 Countries included in the analysis

219 There were 166 countries that contributed to FluNet during the period from 15 Dec 2014 to  
220 12 Sep 2021. All FluNet records for these 166 countries were included in Figure 1A. Upon  
221 filtering based on the quality and extent of the FluNet records, 112 countries were included  
222 in the descriptive study (Figure 1B and Figure 2). For those countries, only the trimesters  
223 satisfying the inclusion criteria were included. Among the 112 countries, covariates were  
224 available only for 93 countries. This last group of countries was included in the regression  
225 analysis. The list of countries discarded at each step and included among the 93 countries  
226 is reported in Table S1.

|                                 | countries in Fig. 1A (166)                                                                                   |  | countries in Fig. 1B and Fig. 2 (112) |  | countries for the regression analyses (93)                                                                                                           |  |
|---------------------------------|--------------------------------------------------------------------------------------------------------------|--|---------------------------------------|--|------------------------------------------------------------------------------------------------------------------------------------------------------|--|
| Central and South America       | AIA, ATG, ABW, BHS, BRB, BLZ, VGB, CYM, CUB, DMA, DOM, GUF, GRD, GLP, MTQ, KNA, LCA, VCT, SUR, TTO, TCA, VEN |  |                                       |  | ARG, BOL, BRA, CHL, COL, CRI, ECU, SLV, GTM, GUY, HTI, HND, JAM, MEX, NIC, PAN, PRY, PER, URY                                                        |  |
| North America and Europe        | BEL, BMU, CZE, GRC, MLT, MNE, NLD, SVK, CHE                                                                  |  | ALB, ISL, OWID_KOS, MKD               |  | AUT, BLR, BIH, BGR, CAN, HRV, DNK, EST, FIN, FRA, DEU, HUN, IRL, ITA, LVA, LTU, LUX, NOR, POL, PRT, MDA, ROU, RUS, SRB, SVN, ESP, SWE, UKR, GBR, USA |  |
| Africa                          | BFA, CAF, TCD, MRT, MAR, RWA, SYC, SLE, SSD, TUN, ZWE                                                        |  | DZA, COD, ETH, GIN, MDG               |  | AGO, CPV, CMR, COG, CIV, EGY, GMB, GHA, GNB, KEN, MLI, MUS, MOZ, NAM, NER, NGA, SEN, ZAF, SDN, TGO, UGA, TZA, ZMB                                    |  |
| Western, Central and South Asia | BHR, CYP, KWT, MMR, SYR, TJK, TKM, ARE, UZB, YEM                                                             |  | ARM, AZE, BTN, IRN, MDV, TLS, PSE     |  | AFG, BGD, KHM, GEO, IND, IDN, IRQ, ISR, JOR, KAZ, KGZ, LAO, LBN, MYS, NPL, OMN, PAK, PHL, QAT, SAU, SGP, LKA, THA, TUR, VNM                          |  |
| Eastern Asia and Oceania        | FJI, PNG                                                                                                     |  | CHN, PRK, NCL                         |  | AUS, JPN, MNG, NZL, KOR                                                                                                                              |  |

227 **Table S1. Countries included in the different steps of the study.** Countries are indicated with their 3-letter  
228 code, OWID\_KOS is for Kosovo. Countries are grouped into five regions, aggregating different influenza  
229 transmission zones [5]: Central and South America (Temperate South America, Tropical South America and  
230 Central America and Caribbean), North America and Europe (North America, Northern Europe, South West  
231 Europe and Eastern Europe), Africa (Northern Africa, Western Africa, Middle Africa, Eastern Africa, Southern  
232 Africa), Western, Southern and Central Asia (Western Asia, Southern Asia, South-East Asia, Central Asia),  
233 Eastern Asia and Oceania (Eastern Asia, Oceania Melanesia Polynesia).

## 234 Regression tree

235 Additional details of the 5-group classification: We provide in the following additional details  
236 on the 5-group repartition presented in Figure 4 of the main paper: the box plot of covariate  
237 values for observations in each group (Figure S2), and the list of countries-trimester  
238 belonging to each group (Table S2).



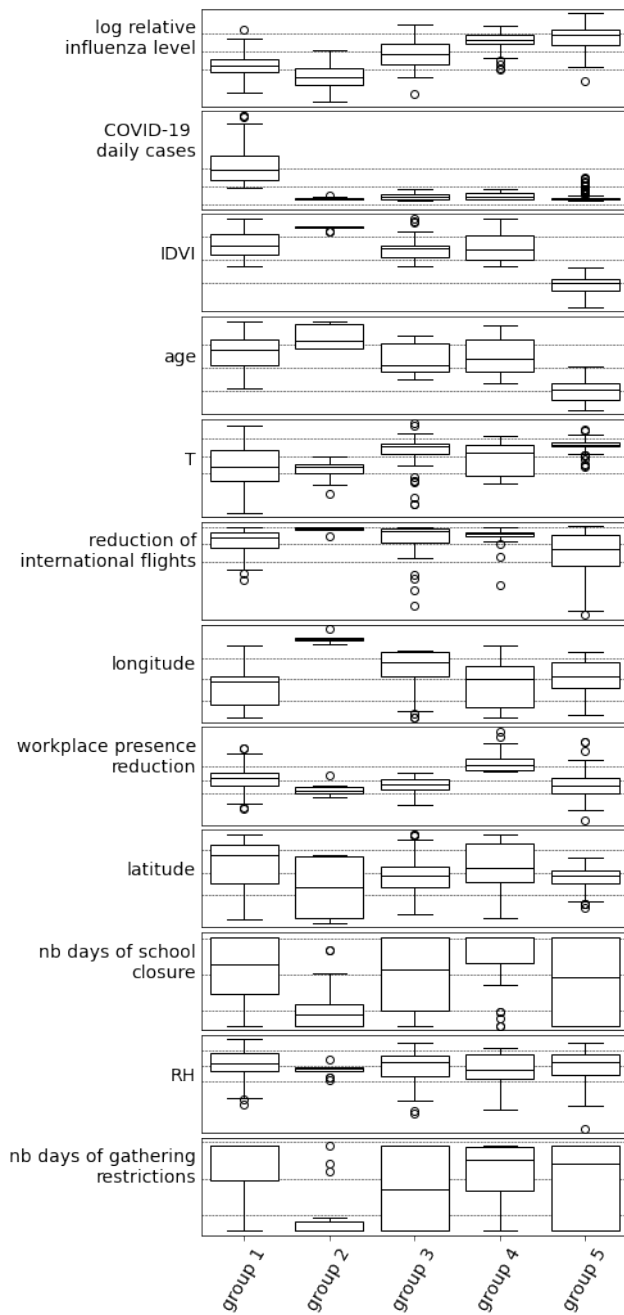

239 **Figure S2. Variable distributions for the five-group partitioning by means of the regression tree.** For each  
 240 variable the boxplot shows the distribution in the group. Horizontal lines show median and quartiles of the whole  
 241 dataset for comparison.

|                                       | Spring 2020                                                               | Summer 2020                            | Autumn 2020                                           | Winter 2020-21                                                                                                                        | Spring 2021                                                                                   | Summer 2021                                                |
|---------------------------------------|---------------------------------------------------------------------------|----------------------------------------|-------------------------------------------------------|---------------------------------------------------------------------------------------------------------------------------------------|-----------------------------------------------------------------------------------------------|------------------------------------------------------------|
| <b>Group 1: leaves 1,2</b>            |                                                                           |                                        |                                                       |                                                                                                                                       |                                                                                               |                                                            |
| Central and South America             | CHL                                                                       | ARG, BRA, CHL, COL, CRI, PAN           | ARG, CHL, COL, CRI                                    | BRA, COL, CRI, MEX                                                                                                                    | ARG, BRA, CHL, COL, CRI, ECU, PAN, PER, PRY                                                   | ARG, BRA, CHL, COL, CRI, PAN, PRY, URY                     |
| North America and Europe              |                                                                           |                                        | CAN, GBR, IRL, PRT, USA                               | AUT, BGR, BLR, CAN, DEU, DNK, ESP, EST, FRA, GBR, HRV, HUN, IRL, ITA, LUX, LVA, MDA, NOR, POL, PRT, ROU, RUS, SRB, SVN, SWE, UKR, USA | AUT, BLR, CAN, DEU, DNK, EST, HRV, IRL, LTU, LUX, LVA, MDA, NOR, POL, ROU, SVN, SWE, UKR, USA |                                                            |
| Africa                                |                                                                           | ZAF                                    |                                                       |                                                                                                                                       | GEO, JOR, LBN, MYS, OMN, QAT, TUR                                                             | ZAF                                                        |
| Western, Southern and Central Asia    | QAT, SGP                                                                  | QAT                                    | ISR, JOR, LBN, OMN                                    | GEO, ISR, JOR, LBN, QAT, TUR                                                                                                          |                                                                                               | LKA, MYS, PHL, THA                                         |
| Eastern Asia and Oceania              |                                                                           |                                        |                                                       |                                                                                                                                       |                                                                                               |                                                            |
| <b>Group 2: leaf 3</b>                |                                                                           |                                        |                                                       |                                                                                                                                       |                                                                                               |                                                            |
| Central and South America             |                                                                           |                                        |                                                       |                                                                                                                                       |                                                                                               |                                                            |
| North America and Europe              |                                                                           |                                        |                                                       |                                                                                                                                       |                                                                                               |                                                            |
| Africa                                |                                                                           |                                        |                                                       |                                                                                                                                       |                                                                                               |                                                            |
| Western, Southern and Central Asia    |                                                                           |                                        |                                                       |                                                                                                                                       |                                                                                               |                                                            |
| Eastern Asia and Oceania              | AUS, JPN                                                                  | AUS, NZL                               | AUS, JPN, KOR                                         | AUS, JPN, KOR                                                                                                                         | AUS, JPN, KOR                                                                                 | AUS                                                        |
| <b>Group 3: leaves 4,5,6,7</b>        |                                                                           |                                        |                                                       |                                                                                                                                       |                                                                                               |                                                            |
| Central and South America             | BRA, PRY                                                                  | PRY                                    | MEX                                                   |                                                                                                                                       | MEX                                                                                           | ECU, PER, SLV                                              |
| North America and Europe              | SWE                                                                       |                                        | NOR                                                   | FIN                                                                                                                                   | RUS                                                                                           |                                                            |
| Africa                                |                                                                           | MUS                                    | ZAF                                                   |                                                                                                                                       | ZAF                                                                                           |                                                            |
| Western, Southern and Central Asia    | THA, VNM                                                                  | IDN, LKA, MYS, THA, VNM                | KAZ, MYS, QAT, SAU, SGP, THA, VNM                     | KAZ, LKA, SAU, SGP, THA, VNM                                                                                                          | IDN, SAU, SGP, THA, VNM                                                                       | QAT, SAU, SGP                                              |
| Eastern Asia and Oceania              | MNG                                                                       |                                        |                                                       | MNG                                                                                                                                   |                                                                                               |                                                            |
| <b>Group 4: leaves 8,9</b>            |                                                                           |                                        |                                                       |                                                                                                                                       |                                                                                               |                                                            |
| Central and South America             | ARG, COL, CRI, MEX, PAN, PER, SLV                                         | SLV                                    |                                                       | ECU                                                                                                                                   |                                                                                               |                                                            |
| North America and Europe              | AUT, CAN, DEU, DNK, EST, GBR, IRL, LVA, NOR, POL, ROU, RUS, SVN, UKR, USA |                                        |                                                       |                                                                                                                                       | GBR                                                                                           |                                                            |
| Africa                                | MUS, ZAF                                                                  |                                        |                                                       |                                                                                                                                       |                                                                                               |                                                            |
| Western, Southern and Central Asia    | IDN, LKA, MYS, OMN, SAU                                                   | SGP                                    | LKA                                                   | IDN, KGZ, OMN                                                                                                                         | LKA, PHL                                                                                      |                                                            |
| Eastern Asia and Oceania              |                                                                           |                                        |                                                       |                                                                                                                                       |                                                                                               |                                                            |
| <b>Group 5: leaves 10,11,12,13,14</b> |                                                                           |                                        |                                                       |                                                                                                                                       |                                                                                               |                                                            |
| Central and South America             | BOL, GTM, HND, HTI, JAM                                                   | HND, HTI, NIC                          | BOL, HND, HTI, NIC                                    | GTM, HND, HTI                                                                                                                         | BOL, GTM, HND, HTI, JAM                                                                       | GTM, HND, HTI, JAM, NIC                                    |
| North America and Europe              |                                                                           |                                        |                                                       |                                                                                                                                       |                                                                                               |                                                            |
| Africa                                | CIV, CMR, EGY, MLI, MOZ, TZA, ZMB                                         | CIV, EGY, KEN, MLI, SEN, TZA, UGA, ZMB | CIV, CMR, EGY, GHA, KEN, NER, SEN, TGO, TZA, UGA, ZMB | CIV, CMR, EGY, GHA, KEN, NER, NGA, SEN, TGO, TZA, ZMB                                                                                 | CIV, CMR, EGY, GHA, KEN, MLI, NGA, SEN, TGO, TZA, UGA, ZMB                                    | CIV, CMR, EGY, GHA, KEN, MLI, NGA, SEN, TGO, TZA, UGA, ZMB |
| Western, Southern and Central Asia    | AFG, BGD, IND, KHM, LAO, NPL                                              | BGD, KHM, LAO, NPL                     | AFG, BGD, IND, IRQ, KHM, LAO, NPL, PAK                | AFG, IND, IRQ, KHM, LAO, NPL, PAK                                                                                                     | AFG, BGD, IND, KHM, LAO, NPL, PAK                                                             | BGD, IND, KHM, LAO, NPL                                    |
| Eastern Asia and Oceania              |                                                                           |                                        |                                                       |                                                                                                                                       |                                                                                               |                                                            |

242 **Table S2. Classification of countries-trimesters according to the high-level partitioning in five groups by**  
243 **means of the regression tree.** Countries are grouped into five regions, aggregating different influenza  
244 transmission zones [5]: Central and South America (Temperate South America, Tropical South America and  
245 Central America and Caribbean), North America and Europe (North America, Northern Europe, South West  
246 Europe and Eastern Europe), Africa (Northern Africa, Western Africa, Middle Africa, Eastern Africa, Southern  
247 Africa), Western, Southern and Central Asia (Western Asia, Southern Asia, South-East Asia, Central Asia),  
248 Eastern Asia and Oceania (Eastern Asia, Oceania Melanesia Polynesia).

249 **Full Regression Tree:** The regression tree selected using the algorithm had 14 terminal  
250 leaves and a coefficient of determination  $R^2=0.69$ . The leaves identified by the model were  
251 well defined (Figure S3), i.e. distinct from each other and characterised by homogeneous  
252 values of log relative influenza level - only for two of them the interquartile width of the  
253 observed log relative influenza level was greater than unity.

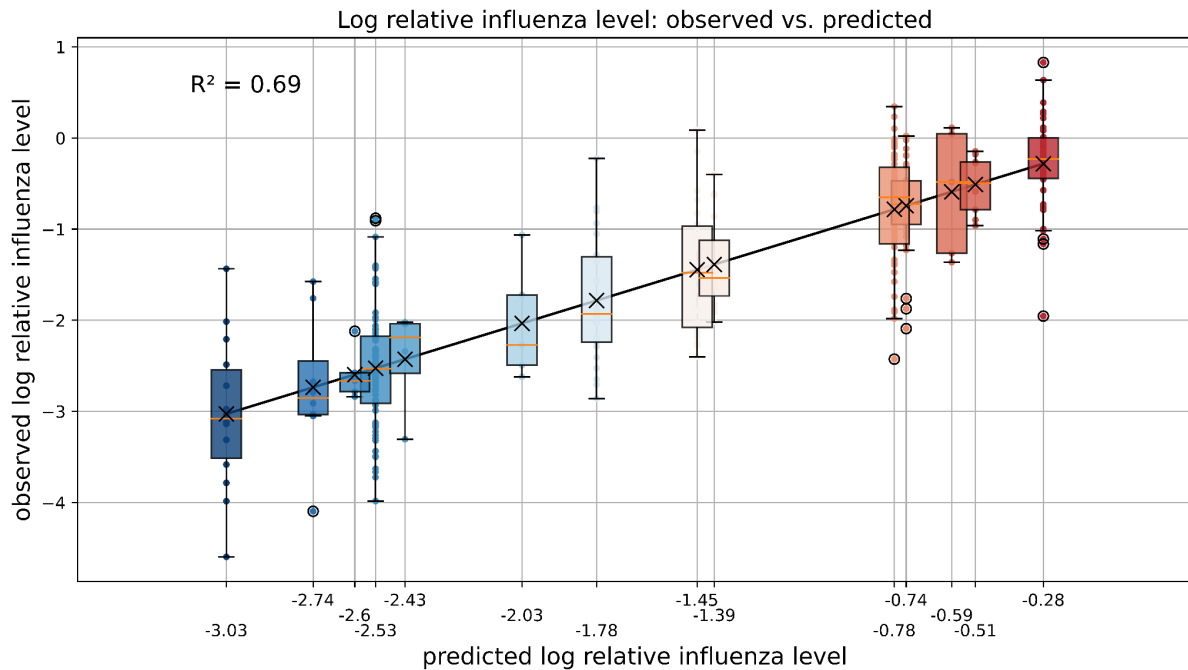

254 **Figure S3: Goodness of fit of the regression tree.** The 14 boxplots display the distributions of the log relative  
 255 influenza level for countries-trimesters of the 14 leaves. The black crosses identify the mean values of the  
 256 distributions (also shown through the color scale) that correspond to the predicted log relative influenza level.  $R^2$   
 257 is the coefficient of determination.

258 The tree is shown in Figure S4. The first four splits are done according to IDVI, COVID-19  
 259 daily cases, longitude and workplace presence reduction as discussed in the main paper.  
 260 The other variables are used for a finer partition in smaller groups. The classification of  
 261 countries-trimesters in leaves is reported in the supplementary data [6].

262 Group 1 (109 observations) is split into leaves 1 and 2. In leaf 1, lower temperatures relative  
 263 to leaf 2 are associated with a greater reduction in influenza. Leaf 1 consists largely of  
 264 temperate countries in Europe, North and South America, during the 2020-2021 influenza  
 265 season, which had a greater influenza reduction. Leaf 2 includes a more limited number of  
 266 observations (26, compared with the 83 in leaf 1) from countries of tropical and subtropical  
 267 areas with  $IDVI > 0.54$ , e.g. Panama, Costa Rica, Colombia, Malaysia. Influenza reduction for  
 268 these countries was less strong compared with leaf 1, but still substantial if compared with  
 269 low-IDVI tropical countries, classified in group 5.

270 Group 2 is formed by a single leaf with well defined properties detailed in the main paper.

271 The 45 observations of the group 3 are distributed in four leaves including a few countries-  
 272 trimesters each. Similarly to the split within group 1, a first split based on temperature  
 273 separates countries with higher temperature and higher log relative influenza level (Saudi  
 274 Arabia and Qatar) from countries with lower temperature and lower log relative influenza  
 275 level. This second branch splits based on the reduction of international flights. On the left  
 276 side of the split there is a group of 8 countries-trimesters where low values of log relative  
 277 influenza level were associated with lower-than-average reduction of international flights,  
 278 reduction of workplace presence and number of days with gathering restrictions. This group  
 279 was characterised by a number of days of school closure higher than average. The right side

280 of the split has two leaves that are discussed in the main paper, i.e. leaf 5 including mainly  
281 Singapore and leaf 6 including mainly other Southeast Asia countries.

282 Group 4 consists of 39 observations. This includes mainly countries during spring 2020 that  
283 are grouped in leaf 9 (34 out of 39 observations). Five observations are separated by the  
284 other because they have a more limited number of days with school closure and a lower log  
285 relative influenza level. This is a heterogeneous set of countries, mainly between winter  
286 2021 and spring 2021.

287 Group 5 contains a significant proportion of all observations (123 out of 330) that are  
288 separated into five leaves (leaves 10, 11, 12, 13 and 14). Interestingly, the five leaves show  
289 a clear trend with increasing log relative influenza level that is, in general, associated with a  
290 decrease in four of the five COVID-19 response variables - COVID-19 daily cases, reduction  
291 of international flights, reduction of workplace presence, and number of days with school  
292 closure. Limitations on gatherings remain moderate for all five leaves. Two splits are based  
293 on the reduction of international flights, between leaf 10 and leaves 11 and 12, and between  
294 leaf 13 and 14. For these two splits a greater reduction of international flights is associated  
295 with a lower influenza log ratio. Finally, leaves 11 and 12 differ in relative humidity. The two  
296 leaves contain almost the same set of countries for different trimesters - e.g. Guatemala,  
297 Honduras, India, Nepal, and Zambia. These are tropical countries characterised by a dry and  
298 a rainy season throughout the year, where influenza usually peaks twice a year with the  
299 main peak during the rainy season [7–10]. Our analysis shows that for rainy seasons the  
300 reduction of influenza was smaller.

**A**

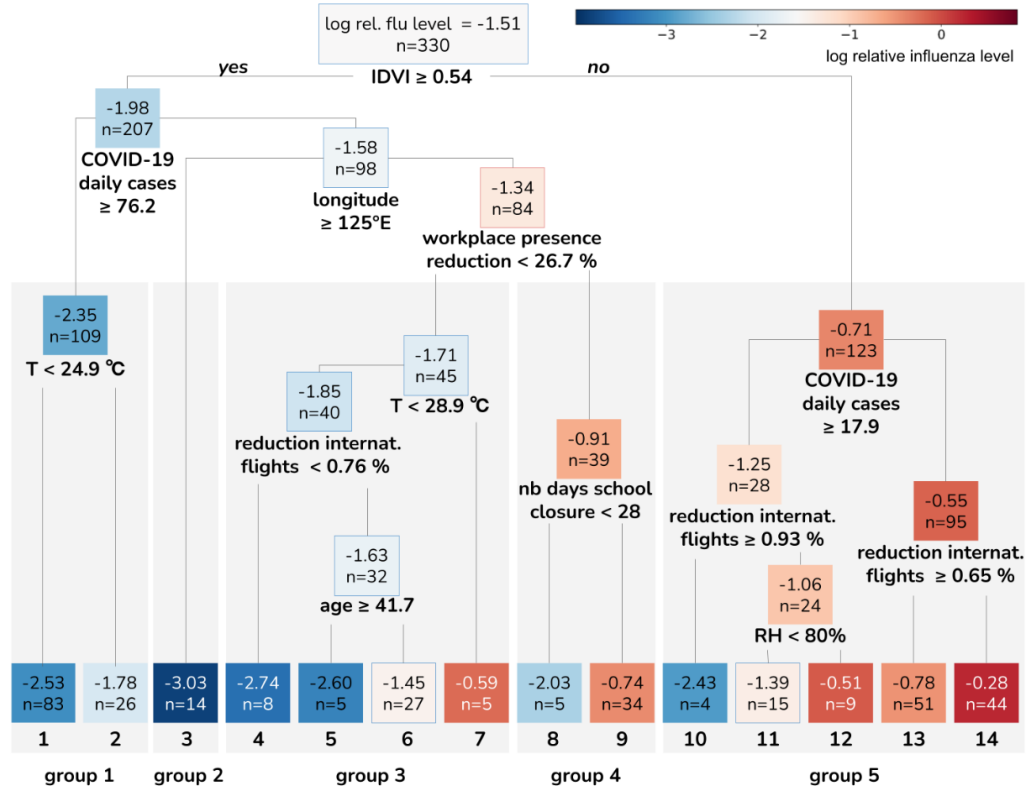

**B**

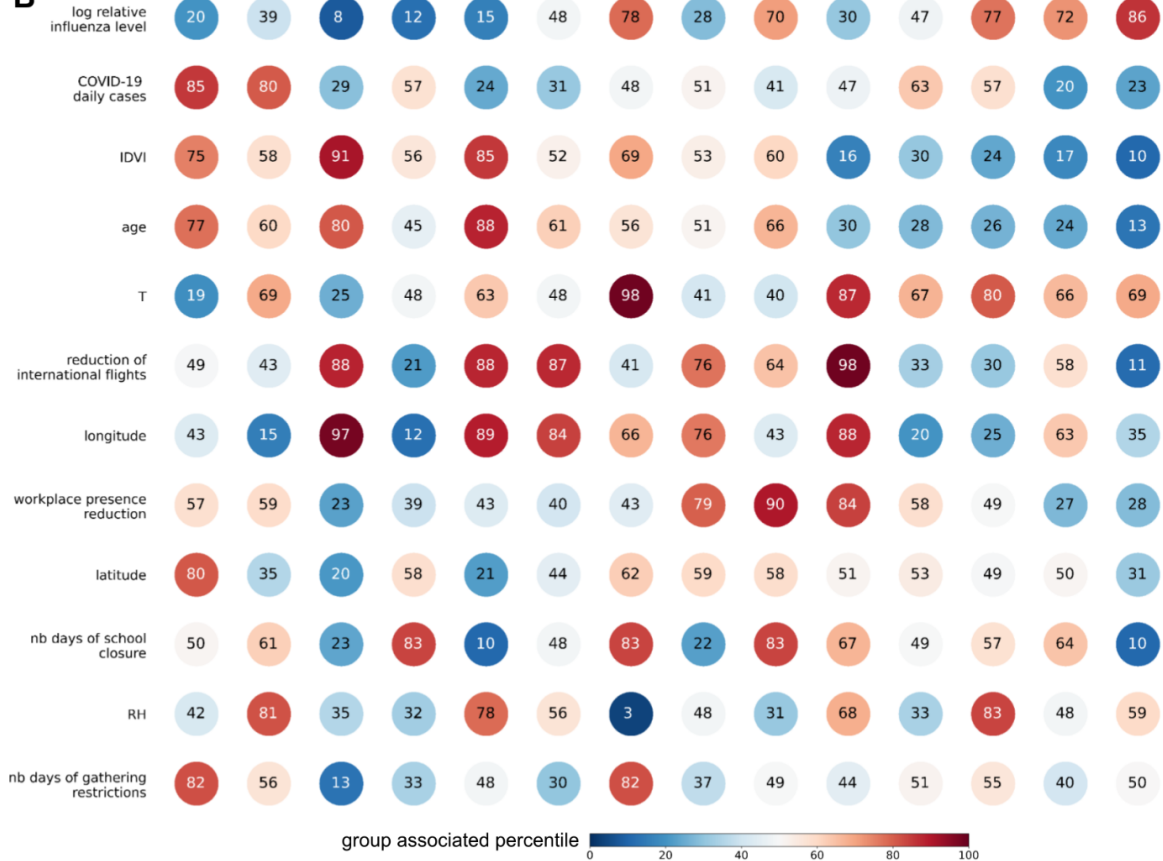

301 **Figure S4: Full regression tree.** **A** Regression tree obtained with the variables selected in Figure 3. For each  
 302 node the average log relative influenza level and the number of observations are reported (the former is also  
 303 indicated with a colour scale). **B** Properties of each leaf. For each covariate the percentile of the whole dataset  
 304 distribution the median of the group corresponds to is indicated with the colour scale and reported in the bubble.

## 305 **Robustness checks and sensitivity analyses**

### 306 **Robustness of the variable selection procedure**

307 The variable selection procedure is a stochastic algorithm that may lead to different results  
308 when repeated. Therefore, variable importance was estimated by averaging over 100  
309 stochastic realisations. To be sure results were stable we repeated the procedure 20 times.  
310 Each time the same 11 predictors are selected as the important covariates for predicting the  
311 log relative influenza ratios.

### 312 **Robustness of the tree structure optimization**

313 The regression tree was regularised by two parameters (*minbucket* and *cp*) optimised with  
314 cross-validation through the stochastic procedure discussed in the Additional methods  
315 section of the supplementary information. To be sure that the procedure converges to a  
316 stable result we repeated it 10 times. The regularisation parameters selected each time were  
317 very similar and led to the construction of trees almost identical to the tree described in the  
318 Results section and in the supplementary information. In particular, the classification of  
319 countries-trimesters in the five high-level groups was robust.

### 320 **Robustness of the tree under small perturbations of the dataset**

321 We assessed the robustness of the tree under small perturbations in the dataset. We built  
322 ten regression trees on a random subsample of 314 observations (~95% of the total)  
323 keeping the same 11 predictors and hyperparameters. The ten resulting trees (i.e. the  
324 perturbed trees) were compared with the tree built from the entire dataset (i.e. the reference  
325 tree) using the Adjusted Rand Index (ARI) [11]. Specifically, we compared the classification  
326 in 5 groups to assess the robustness of the 5-group repartition discussed in the main paper.  
327 The average score value for the ten comparisons is 0.86, indicating good agreement  
328 between the perturbed and reference trees.

### 329 **Sensitivity of the variable selection under changes on the assumption made**

330 We tested whether the predictors of the log relative influenza level changed with the choices  
331 made throughout the analysis. The creation of the dataset of observations is based on two  
332 main assumptions: (i)  $k=0.5$  positive cases had been added to each country-trimester in  
333 order to remove zero counts of influenza cases, and (ii) a threshold  $s=130$  for the minimum  
334 number of tests processed per quarter was set to discard countries-trimesters with poor  
335 data. In addition, some choices were made when defining the covariates. We tested the  
336 robustness of our results to all these choices by analysing the following alternative models  
337 (the baseline model is here referred as *base 0* model):

- 338 ● *base 1*:  $k=1$  (instead of 0.5),  $s=130$ , same covariates of the base 0 model;
- 339 ● *base 2*:  $k=0.5$ ,  $s=26$  (instead of 130), same covariates of the base 0 model;
- 340 ● *base 3*:  $k=0.5$ ,  $s=260$  (instead of 130), same covariates of the base 0 model;
- 341 ● *Cov 1*:  $k=0.5$ ,  $s=130$ , COVID-19 daily deaths is used in alternative to COVID-19 daily  
342 cases to quantify the intensity of the COVID-19 epidemic;
- 343 ● *Mob 1*:  $k=0.5$ ,  $s=130$ , the public transport station presence reduction is tested in  
344 alternative to workplace presence reduction to capture changes of social activity;
- 345 ● *Mob 2*:  $k=0.5$ ,  $s=130$ , the recreation place presence reduction is tested in alternative  
346 to workplace presence reduction to capture changes of social activity;

- 347 ● *Mob 3*:  $k=0.5$ ,  $s=130$ , the increase in home presence is tested in alternative to  
348 workplace presence reduction to capture changes of social activity;
- 349 ● *No Age*:  $k=0.5$ ,  $s=130$ , the variables age is removed among the set of covariates to  
350 be included in the regression;
- 351 ● *No IDVI*:  $k=0.5$ ,  $s=130$ , the variables IDVI is removed among the set of covariates to  
352 be included in the regression;
- 353 ● *Str. Idx*:  $k=0.5$ ,  $s=130$ , all variables associated with NPIs are replaced by the  
354 stringency index.

355 For all the alternative models the selected sets of important factors are highly similar (Table  
356 S3): impact of COVID-19, international mobility, workplace presence reduction (or the  
357 alternative proxy of social activity considered), IDVI, age, temperature and longitude always  
358 result significant, while latitude and RH are discarded only once and twice respectively. All  
359 proxies of social activity tested were classified as important. The stringency index when  
360 included was not selected, indicating that the aggregate information it carries is not important  
361 in explaining the influenza reduction. This is consistent with the fact that only 2 out of the 11  
362 governmental response variables were selected as important.

363 We used the ARI similarity index to compare the sensitivity trees and the baseline tree up to  
364 the five-group repartitions. Models *Mob 1*, *Mob 2*, *Mob 3*, *No Age*, *Str. Idx.* led to an  
365 excellent recovery of the baseline tree ( $ARI > 0.9$ ). The 5-group repartition showed the same  
366 behaviour as in the baseline model. The tree obtained with *Base 1* was in good agreement  
367 with the baseline tree. Interestingly, removing IDVI from the set of covariates led to only a  
368 moderate recovery of the baseline tree ( $ARI= 0.69$ ), despite IDVI and Age being highly  
369 correlated. Age is not able to fully compensate for IDVI in creating the 5 group repartition  
370 discussed in the main paper. This is consistent with the fact that both covariates were found  
371 to be important by the VSURF procedure.

372 The comparison of trees obtained with *base 2*, *base 3* and *Cov 1* and the baseline tree up to  
373 the five-groups repartition led to lower similarity values ( $ARI$  between 0.53 and 0.66). Still,  
374 we found that the four trees shared in large part the same behaviour. In particular, the first  
375 split was the same (i.e. based on IDVI with the same threshold value), meaning that all  
376 partitions had the distinction between high IDVI, low influenza countries and low IDVI, high  
377 influenza ones. Also, the 2020 spring trimesters of temperate countries (comprising the bulk  
378 of group 4) remained in great part grouped together and separated from the rest. In all three  
379 sensitivity trees, countries of group 2 of the baseline tree (zero-covid countries) were  
380 grouped together and included in a larger group together with countries of group 1 of the  
381 baseline tree.

| variable                                        | base 0 | base 1 | base 2 | base 3 | Cov 1 | Mob 1 | Mob 2 | Mob 3 | No Age | No Idvi | Str. Idx |
|-------------------------------------------------|--------|--------|--------|--------|-------|-------|-------|-------|--------|---------|----------|
| Covid-19 daily cases                            | Green  | Green  | Green  | Green  | Green | Green | Green | Green | Green  | Green   | Green    |
| Covid-19 daily deaths                           | Green  | Green  | Green  | Green  | Green | Green | Green | Green | Green  | Green   | Green    |
| reduction of international flights              | Green  | Green  | Green  | Green  | Green | Green | Green | Green | Green  | Green   | Green    |
| reduction of international and domestic flights | Green  | Green  | Green  | Green  | Green | Green | Green | Green | Green  | Green   | Green    |
| workplace presence reduction                    | Green  | Green  | Green  | Green  | Green | Green | Green | Green | Green  | Green   | Green    |
| station presence reduction                      | Green  | Green  | Green  | Green  | Green | Green | Green | Green | Green  | Green   | Green    |
| recreation place presence reduction             | Green  | Green  | Green  | Green  | Green | Green | Green | Green | Green  | Green   | Green    |
| home presence rise                              | Green  | Green  | Green  | Green  | Green | Green | Green | Green | Green  | Green   | Green    |
| IDVI                                            | Green  | Green  | Green  | Green  | Green | Green | Green | Green | Green  | Green   | Green    |
| age                                             | Green  | Green  | Green  | Green  | Green | Green | Green | Green | Green  | Green   | Green    |
| RH                                              | Green  | Green  | Green  | Green  | Green | Green | Green | Green | Green  | Green   | Green    |
| T                                               | Green  | Green  | Green  | Green  | Green | Green | Green | Green | Green  | Green   | Green    |
| latitude                                        | Green  | Green  | Green  | Green  | Green | Green | Green | Green | Green  | Green   | Green    |
| longitude                                       | Green  | Green  | Green  | Green  | Green | Green | Green | Green | Green  | Green   | Green    |
| nb days of public event restrictions            | Red    | Red    | Red    | Red    | Red   | Red   | Red   | Red   | Red    | Red     | Red      |
| nb days of public transport restrictions        | Red    | Red    | Red    | Red    | Red   | Red   | Red   | Red   | Red    | Red     | Red      |
| nb days of contact tracing implementation       | Red    | Red    | Red    | Red    | Red   | Red   | Red   | Red   | Red    | Red     | Red      |
| nb days of facial covering requirements         | Red    | Red    | Red    | Red    | Red   | Red   | Red   | Red   | Red    | Red     | Red      |
| nb days of international travel restrictions    | Red    | Red    | Red    | Red    | Red   | Red   | Red   | Red   | Red    | Red     | Red      |
| nb days of elderly shielding                    | Red    | Red    | Red    | Red    | Red   | Red   | Red   | Red   | Red    | Red     | Red      |
| nb days of gathering restrictions               | Red    | Red    | Red    | Red    | Red   | Red   | Red   | Red   | Red    | Red     | Red      |
| nb days of school closure                       | Red    | Red    | Red    | Red    | Red   | Red   | Red   | Red   | Red    | Red     | Red      |
| nb days of stay at home requirements            | Red    | Red    | Red    | Red    | Red   | Red   | Red   | Red   | Red    | Red     | Red      |
| nb days of testing implementation               | Red    | Red    | Red    | Red    | Red   | Red   | Red   | Red   | Red    | Red     | Red      |
| nb days of workplace closure                    | Red    | Red    | Red    | Red    | Red   | Red   | Red   | Red   | Red    | Red     | Red      |
| stringency index                                | Red    | Red    | Red    | Red    | Red   | Red   | Red   | Red   | Red    | Red     | Red      |
| k                                               | 0.5    | 1      | 0.5    | 0.5    | 0.5   | 0.5   | 0.5   | 0.5   | 0.5    | 0.5     | 0.5      |
| s                                               | 130    | 130    | 26     | 260    | 130   | 130   | 130   | 130   | 130    | 130     | 130      |
| nb observations                                 | 330    | 335    | 390    | 279    | 321   | 330   | 330   | 330   | 330    | 330     | 330      |
| nb tested predictors                            | 20     | 20     | 20     | 20     | 20    | 20    | 20    | 20    | 19     | 19      | 10       |
| nb selected predictors                          | 11     | 11     | 12     | 11     | 14    | 9     | 11    | 11    | 10     | 11      | 7        |
| Similarity index (ARI)                          | -      | 0.82   | 0.61   | 0.53   | 0.66  | 0.94  | 0.95  | 0.92  | 1.00   | 0.69    | 1.00     |

382 **Table S3. Predictors selected for 11 alternative models.** Each model includes only variables associated with a  
383 colored cell, green is for the selected variables, red for the rejected ones. Additional information about the  
384 parameters  $k, s$  used for the definition of the observation set is provided. Also, the similarity index is reported: it  
385 measures the similarity of the five-group classifications made by each alternative model compared with the  
386 reference model (*base 0*).

## 387 Bibliography

- 388 1. Pawlowsky-Glahn V, Egozcue JJ. BLU Estimators and Compositional Data. *Math Geol.* 2002;34: 259–274. doi:10.1023/A:1014890722372
- 389 2. Breiman L, Friedman JH, Olshen RA, Stone CJ. *Classification And Regression Trees*. 1st ed. Chapman and Hall/CRC; 1984. doi:10.1201/9781315139470
- 390 3. Therneau TM, Atkinson B, Ripley B. *rpart : Recursive Partitioning and Regression Trees*. 2015 [cited 1 Jul 2022]. Available: <https://cran.r-project.org/web/packages/rpart/rpart.pdf>
- 391 4. Antoniadis A, Lambert-Lacroix S, Poggi J-M. Random forests for global sensitivity analysis: A selective review. *Reliab Eng Syst Saf.* 2021;206: 107312. doi:10.1016/j.ress.2020.107312
- 392 5. Karlsson EA, Mook P a. N, Vandemaele K, Fitzner J, Hammond A, Cozza V, et al. Review of global influenza circulation, late 2019 to 2020, and the impact of the COVID-19 pandemic on influenza circulation. *Wkly Epidemiol Rec.* 2021; 241–265.
- 393 6. Supplementary data. Available: [https://docs.google.com/spreadsheets/d/1PirC3iJ\\_yrlw9CoNL0\\_dkmXEI7DVVoJp/edit?usp=sharing&oid=112424629266716674645&rtpof=true&sd=true](https://docs.google.com/spreadsheets/d/1PirC3iJ_yrlw9CoNL0_dkmXEI7DVVoJp/edit?usp=sharing&oid=112424629266716674645&rtpof=true&sd=true)
- 394 7. Tamerius JD, Shaman J, Alonso WJ, Bloom-Feshbach K, Uejio CK, Comrie A, et al. Environmental Predictors of Seasonal Influenza Epidemics across Temperate and Tropical Climates. *PLOS Pathog.* 2013;9: e1003194. doi:10.1371/journal.ppat.1003194
- 395 8. Tamerius J, Nelson MI, Zhou SZ, Viboud C, Miller MA, Alonso WJ. Global Influenza Seasonality: Reconciling Patterns across Temperate and Tropical Regions. *Environ Health Perspect.* 2011;119: 439–445. doi:10.1289/ehp.1002383
- 396 9. Shek LP-C, Lee B-W. Epidemiology and seasonality of respiratory tract virus infections in the tropics. *Paediatr Respir Rev.* 2003;4: 105–111. doi:10.1016/S1526-0542(03)00024-1



- 412 10. Soebiyanto RP, Clara W, Jara J, Castillo L, Sorto OR, Marinero S, et al. The Role of  
413 Temperature and Humidity on Seasonal Influenza in Tropical Areas: Guatemala, El  
414 Salvador and Panama, 2008–2013. PLOS ONE. 2014;9: e100659.  
415 doi:10.1371/journal.pone.0100659  
416 11. Hubert L, Arabie P. Comparing partitions. J Classif. 1985;2: 193–218.  
417 doi:10.1007/BF01908075
